# Supplementary material for: Plasmonic photothermal properties of silver nanoparticle grating films
Source: Royal Society of Chemistry journal article supplement (doi:10.1039/d1cp05893b), 2022-01-01
Supplement: d1cp05893b1.pdf [file d1cp05893b1.pdf]

## Electronic Supplementary Information

# Plasmonic Photothermal Properties of Silver Nanoparticle Grating Films

Siriporn Anuthum,<sup>ab</sup> Fugo Hasegawa,<sup>a</sup> Chutiparn Lertvachirapaiboon,<sup>a</sup> Kazunari  
Shinbo,<sup>a</sup> Keizo Kato,<sup>a</sup> Kontad Ounnunkad,<sup>\*b</sup> and Akira Baba<sup>\*a</sup>

Graduate School of Science and Technology, Niigata University, 8050 Ikarashi-2-nocho,  
Nishi-ku, Niigata 950-2181, Japan.

E-mail: ababa@eng.niigata-u.ac.jp

Department of Chemistry and Center of Excellence for Innovation in Chemistry (PERCH-  
CIC), Faculty of Science, Chiang Mai University, Chiang Mai 50200, Thailand.

E-mail: kontad.ounnunkad@cmu.ac.th

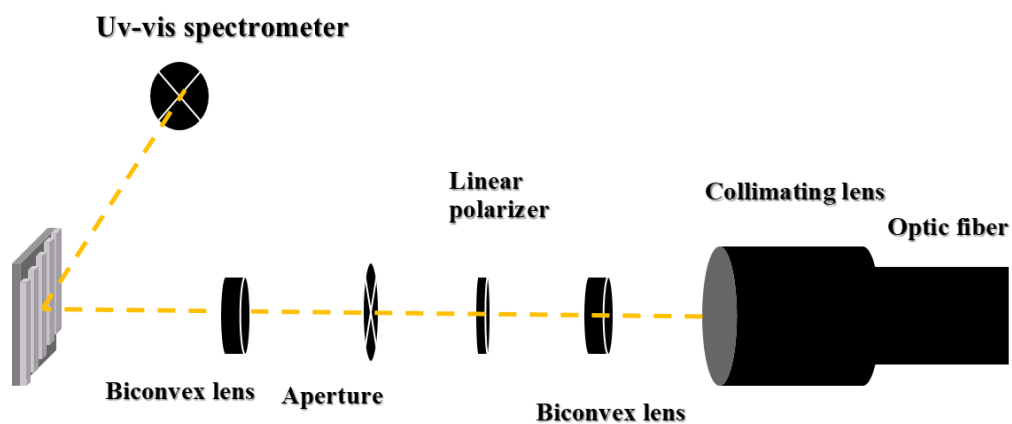

**Figure S1.** Schematic of the SPR reflectivity measurement of fabricated plasmonic photothermal films

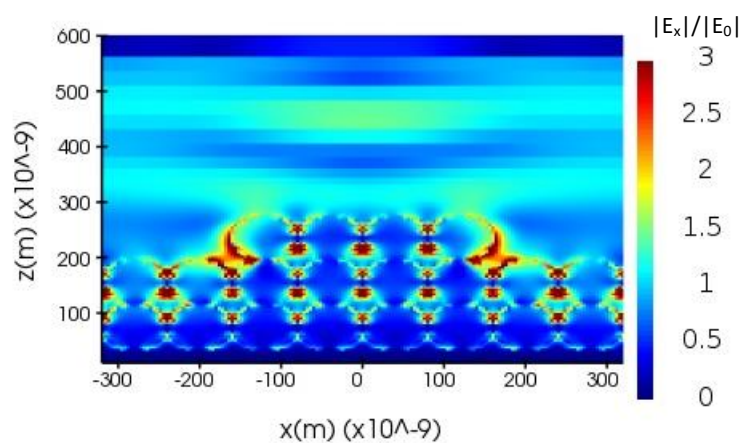

AgNP grating film ( $\Lambda = 640$  nm,  $\lambda = 450$  nm)

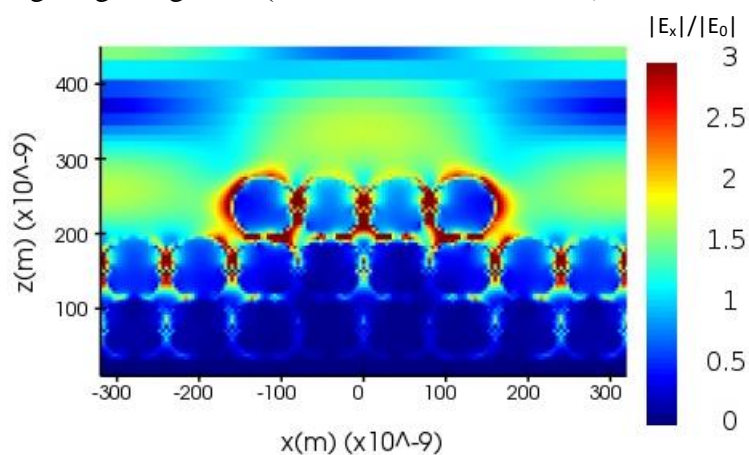

AgNP grating film ( $\Lambda = 640$  nm,  $\lambda = 660$  nm)

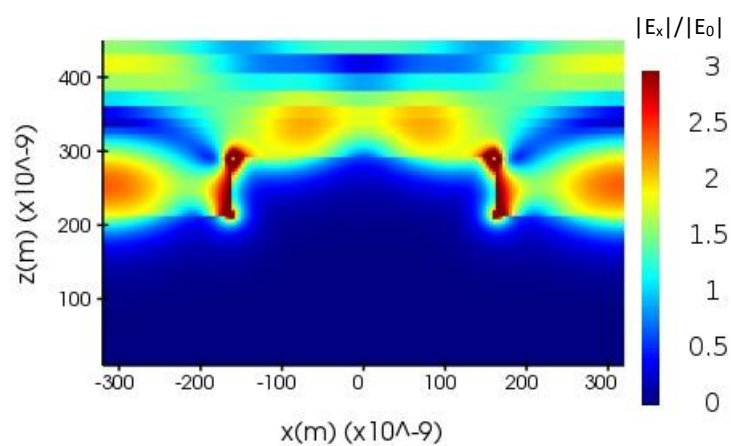

non-NP Ag grating film ( $\Lambda = 640$  nm,  $\lambda = 450$  nm)

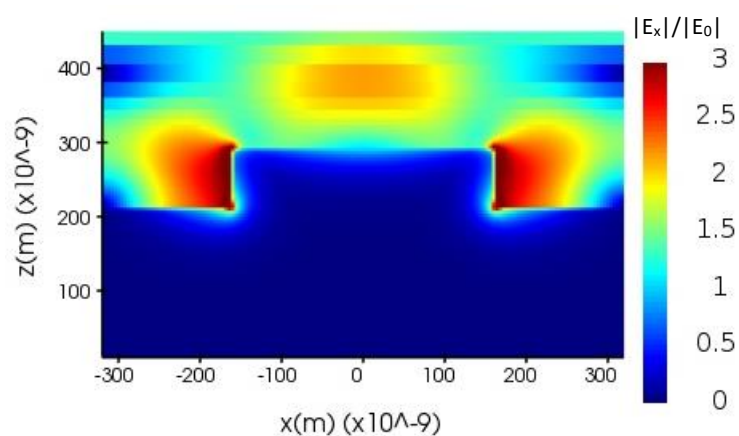

non-NP Ag grating film ( $\Lambda = 640$  nm,  $\lambda = 660$  nm)

**Figure S2.** Electric field distributions at an incident light angle of  $0^\circ$  with p-polarization obtained from the FDTD simulation with the grating pitch of 640 nm

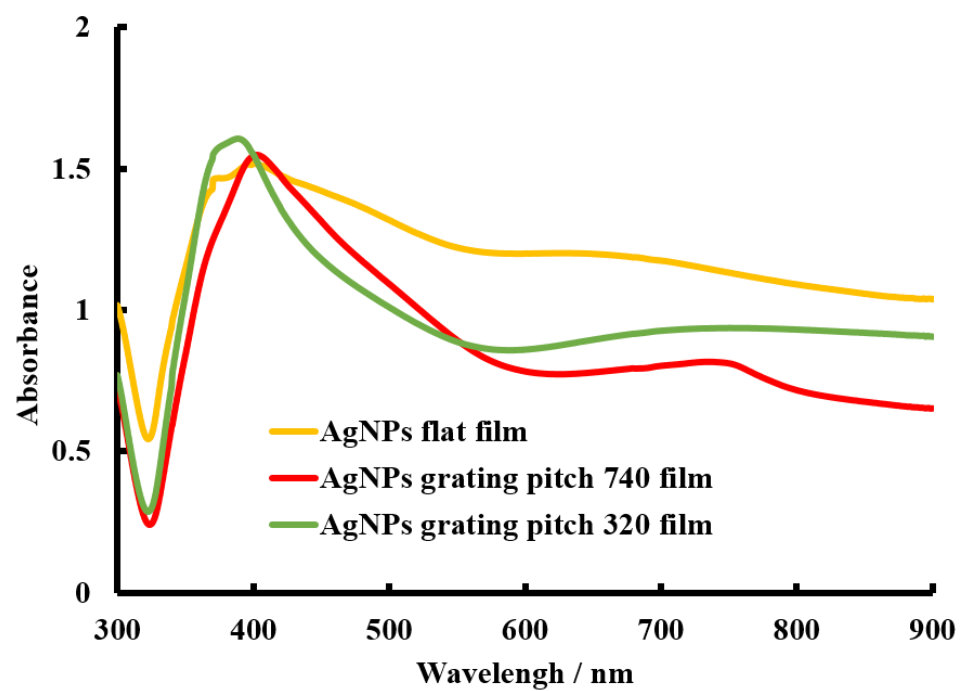

**Figure S3.** UV–visible absorption property of a sufficiently thin spin-coated AgNP film and AgNP grating films on glass substrate

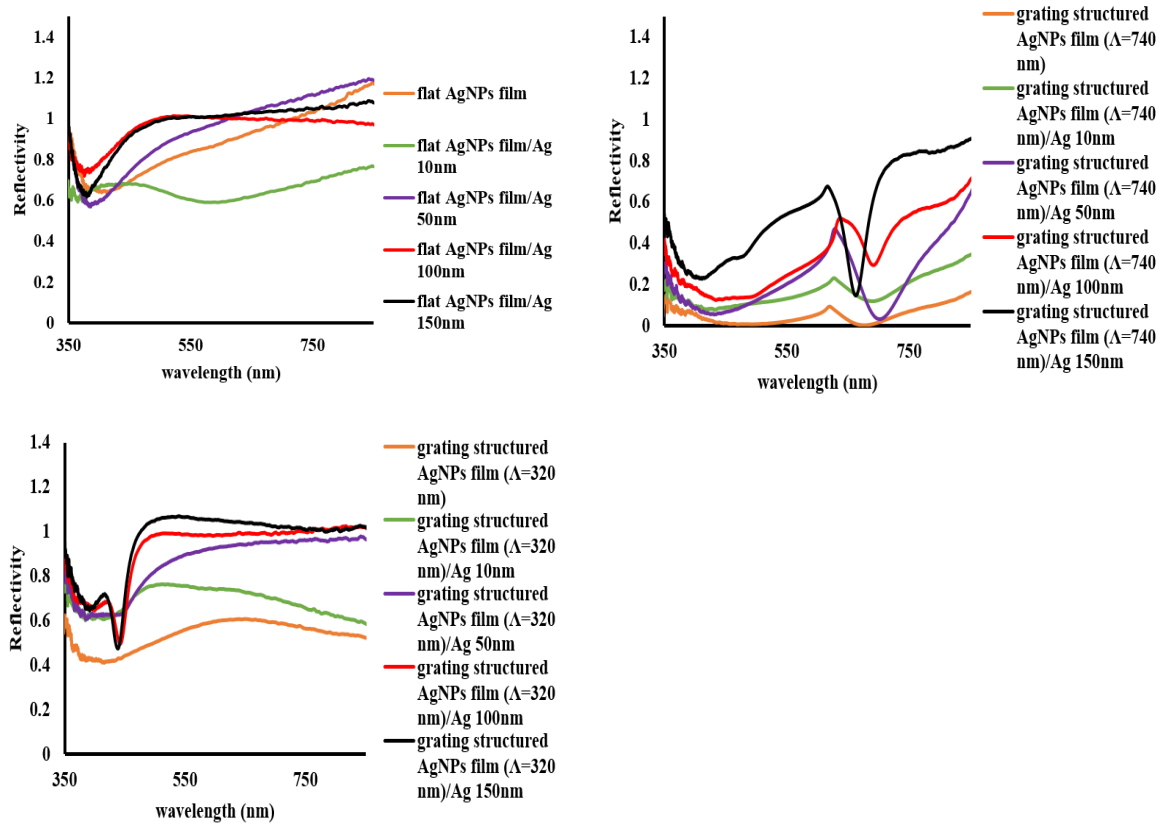

**Figure S4.** Reflectivity curves of the AgNP film/evaporated Ag film and AgNP grating film ( $\Lambda = 320$  nm and 740 nm)/evaporated Ag film as a function of thickness of the evaporated Ag film at an incident light angle of  $10^\circ$  with p-polarization

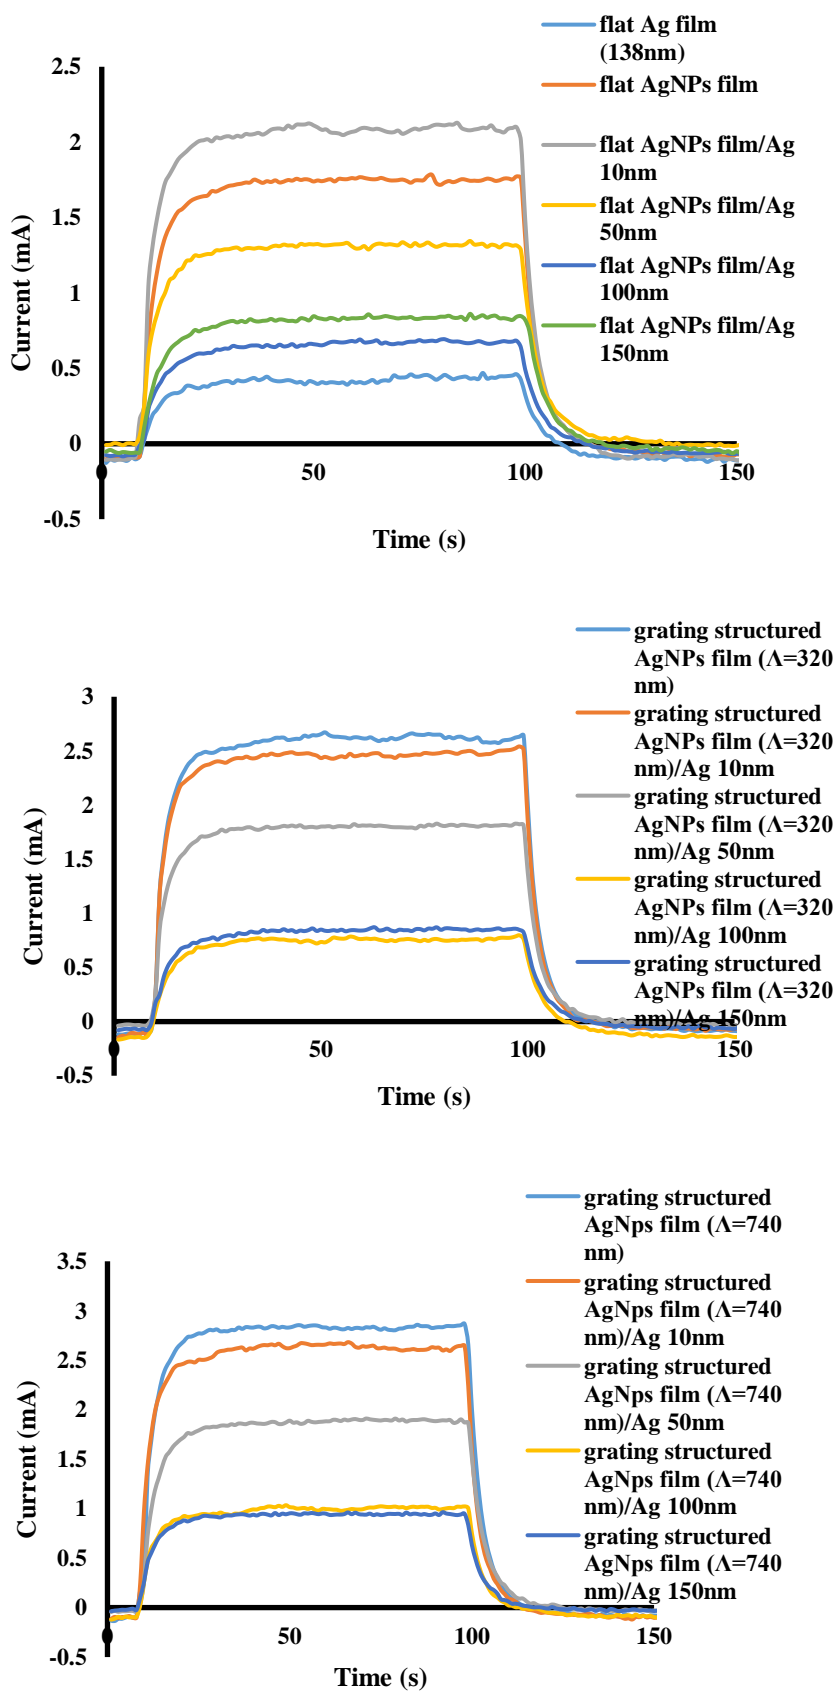

Figure S5. Generated current versus time upon illumination
